# Supplementary material for: Fluconazole worsened lung inflammation, partly through lung microbiome dysbiosis in mice with ovalbumin-induced asthma
Source: PeerJ journal article supplement (doi:10.7717/peerj.18421), 2024-10-28
Supplement: Lung_microbiome_was_analysed_by_company.pdf [file Lung_microbiome_was_analysed_by_company.pdf]

# 16S rRNA Sequencing Report

**Project ID:** 23S0013

**Sample received date:** 5-07-2023

**Reported date:** 25-09-2023

**Sample type:** DNA

**Sample size:** 12 samples

---

## 16S rRNA Metagenomic Sequencing Report

- Quality profiles
- Alpha diversity
- Beta diversity
- Taxonomic profiles and Krona plots
- Linear discriminant analysis effect size (LEfSe) and Cladogram

## Optional Bioinformatics

- Phylogenetic tree
- Heatmap of relative abundance
- Venn diagram
- Metabolic pathway prediction
- NCBI Genbank submission

Reported by

  
Lampet Wongsaroj, M.Sc, Ph.D  
Scientist

  
Kritsakorn Saninjuk, M.Sc, Ph.D  
Scientist

# 16S rRNA Sequencing

## Results

### 1. Sample information

The sample information table shows your sample ID, sample groups, and the names of fastq files obtained from 16S rRNA Metagenomic Sequencing. In this report, only 10 samples are shown in the following table. If there are more than 10 samples in a project, the complete sample information table can be accessed from the link below the table.

| No. | Customer label   | Sample ID       | Group                     | Raw seq R1 file (fastq)               | Raw seq R2 file (fastq)               |
|-----|------------------|-----------------|---------------------------|---------------------------------------|---------------------------------------|
| 1   | Control Lung 1   | Control-Lung1   | Control                   | Control-Lung1_S10_L001_R1_001.fastq   | Control-Lung1_S10_L001_R2_001.fastq   |
| 2   | Control Lung 2   | Control-Lung2   | Control                   | Control-Lung2_S11_L001_R1_001.fastq   | Control-Lung2_S11_L001_R2_001.fastq   |
| 3   | Control Lung 3   | Control-Lung3   | Control                   | Control-Lung3_S12_L001_R1_001.fastq   | Control-Lung3_S12_L001_R2_001.fastq   |
| 4   | Fluco Lung 1     | Fluco-lung1     | Fluconazole               | Fluco-lung1_S13_L001_R1_001.fastq     | Fluco-lung1_S13_L001_R2_001.fastq     |
| 5   | Fluco Lung 2     | Fluco-lung2     | Fluconazole               | Fluco-lung2_S14_L001_R1_001.fastq     | Fluco-lung2_S14_L001_R2_001.fastq     |
| 6   | Fluco Lung 3     | Fluco-lung3     | Fluconazole               | Fluco-lung3_S15_L001_R1_001.fastq     | Fluco-lung3_S15_L001_R2_001.fastq     |
| 7   | OVA+Fluco Lung 1 | OVA-Fluco-lung1 | OVA+Adjuvant+ Fluconazole | OVA-Fluco-lung1_S16_L001_R1_001.fastq | OVA-Fluco-lung1_S16_L001_R2_001.fastq |
| 8   | OVA+Fluco Lung 2 | OVA-Fluco-lung2 | OVA+Adjuvant+ Fluconazole | OVA-Fluco-lung2_S17_L001_R1_001.fastq | OVA-Fluco-lung2_S17_L001_R2_001.fastq |
| 9   | OVA+Fluco Lung 3 | OVA-Fluco-lung3 | OVA+Adjuvant+ Fluconazole | OVA-Fluco-lung3_S18_L001_R1_001.fastq | OVA-Fluco-lung3_S18_L001_R2_001.fastq |
| 10  | OVA Lung 1       | OVA-Lung1       | OVA+Adjuvant              | OVA-Lung1_S10_L001_R1_001.fastq       | OVA-Lung1_S10_L001_R2_001.fastq       |

#### Raw seq files:

All FASTQ files

#### Table:

Summary\_samples\_information.txt

## 2. Quality profiles

### Track Read Changes

The numbers of sequence read from all samples in each step of the pipeline analysis are shown to estimate the performance of the run and how do reads change through the pipeline. More than 50,000 reads are recommended from raw sequencing reads.

- Trimming is used for removing the primer and adaptor sequences from V3V4 amplicon reads.

- Filtering is used to filter low-quality sequences of both forward and reverse reads, which are unexpected reads. Normally, the quality of reverse read drops off at the end of read more than in the forward read.

- Denoising refers to a process that removes sequence errors from amplicon reads.

- Merging of paired-end reads generates one consensus sequence by assembly between the forward and reverse overlapping reads.

- Nonchim (refers to non-chimeric reads) is a process to remove chimeric reads. Chimeras occur during PCR reaction step when two sequencing reads incorrectly joined together. They are indicative of 16S structural variation.

- Percentage calculates the percent of remaining sequencing reads after non-chimeric process from total reads at the first step.

In this report, only 10 samples are provided in the following table. If there are more than 10 samples in your project, the complete sample information table can be accessed from the link below the table.

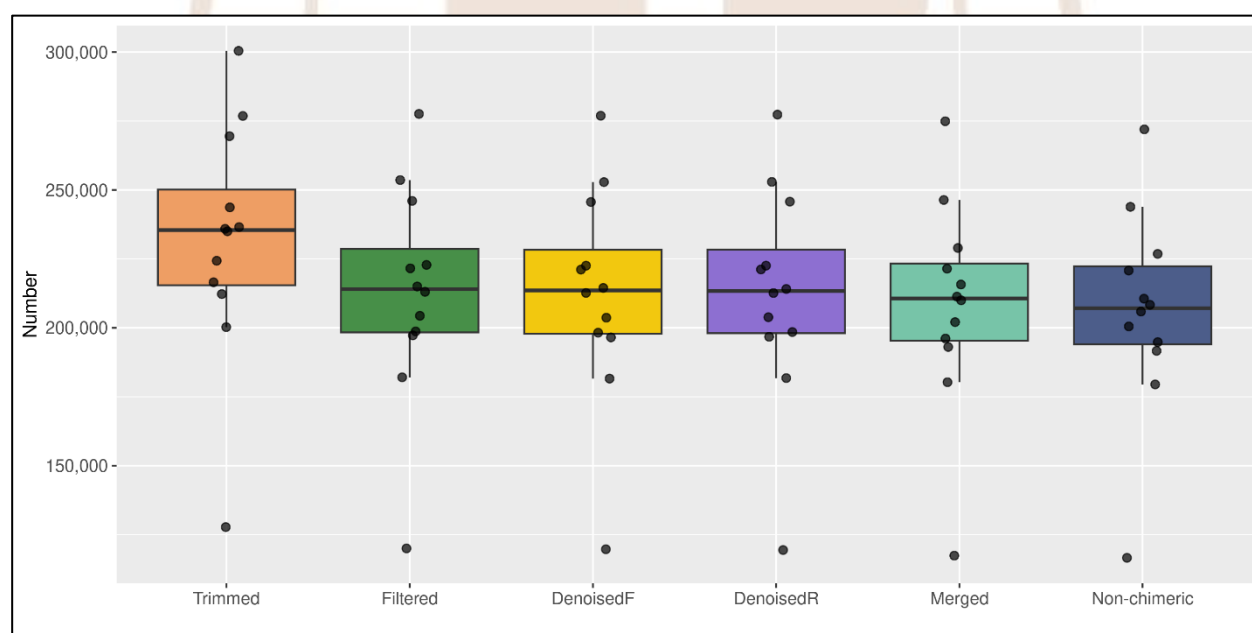

| Sample ID        | Trimmed-V3V4 | Filtered | DenoisedF | DenoisedR | Merged  | Nonchim | Remove mitochondria |
|------------------|--------------|----------|-----------|-----------|---------|---------|---------------------|
| Control Lung 1   | 224,328      | 204,371  | 203,676   | 203,847   | 202,078 | 200,518 | 89,127              |
| Control Lung 2   | 200,258      | 182,056  | 181,580   | 181,780   | 180,289 | 179,480 | 100,919             |
| Control Lung 3   | 269,503      | 246,036  | 245,639   | 245,763   | 228,958 | 226,815 | 86,703              |
| Fluco Lung 1     | 212,240      | 197,270  | 196,539   | 196,753   | 193,069 | 191,648 | 64,884              |
| Fluco Lung 2     | 216,516      | 198,707  | 198,253   | 198,482   | 196,120 | 194,822 | 67,696              |
| Fluco Lung 3     | 235,897      | 214,996  | 214,469   | 214,104   | 211,327 | 210,577 | 97,788              |
| OVA+Fluco Lung 1 | 127,737      | 120,010  | 119,703   | 119,429   | 117,395 | 116,599 | 14,492              |
| OVA+Fluco Lung 2 | 235,004      | 221,567  | 221,122   | 221,171   | 215,710 | 205,907 | 26,521              |
| OVA+Fluco Lung 3 | 276,844      | 253,586  | 252,858   | 252,927   | 246,379 | 243,880 | 65,220              |
| OVA Lung 1       | 300,446      | 277,594  | 276,922   | 277,328   | 274,915 | 271,981 | 94,720              |

**Figure:**

Box\_plot\_summary\_filter.png

**Table:**

Summary\_filter\_reads\_rm\_mitochondria.txt

## Rarefaction analysis

Rarefaction curve represents the species richness (the number of different species) within and between sequencing reads. It can be used to estimate how many amplicon sequence variants (ASVs) or taxa would have been found in the same size of reads (1). Rarefaction curve rapidly increases at first where every read in the samples are identified (like the exponential phase), then slowly reaches the plateau stage when the rare species remain to be sampled (like the stationary phase). The plateau curve in rarefaction analysis determines whether sufficient reads have been detected to get a good representation of the microbial compositions in an environment. More samples can increase the number of reads with good representatives of all taxa. The figure of rarefaction curve can be downloaded with the same filename below the figure.

### Suggestion by Porcinotec:

The approximate saturation of microbial richness of all samples was 14,492 sequencing depths, as estimated by the rarefaction curves. The plateau curve in rarefaction was observed, when approximately 5,000 sequencing depths were reached, excepted Fluco Lung3. This finding sufficiently estimated the true bacterial compositions of microbiome in mice among the sample groups. The observed numbers of ASVs were varied among the samples. Control group showed the highest number of observed ASVs, while OVA+Adjuvant+Fluconazole showed the lowest number of observed ASVs. The data suggested that OVA+Adjuvant+Fluconazole had an effect on the number of observed ASVs compared to control.

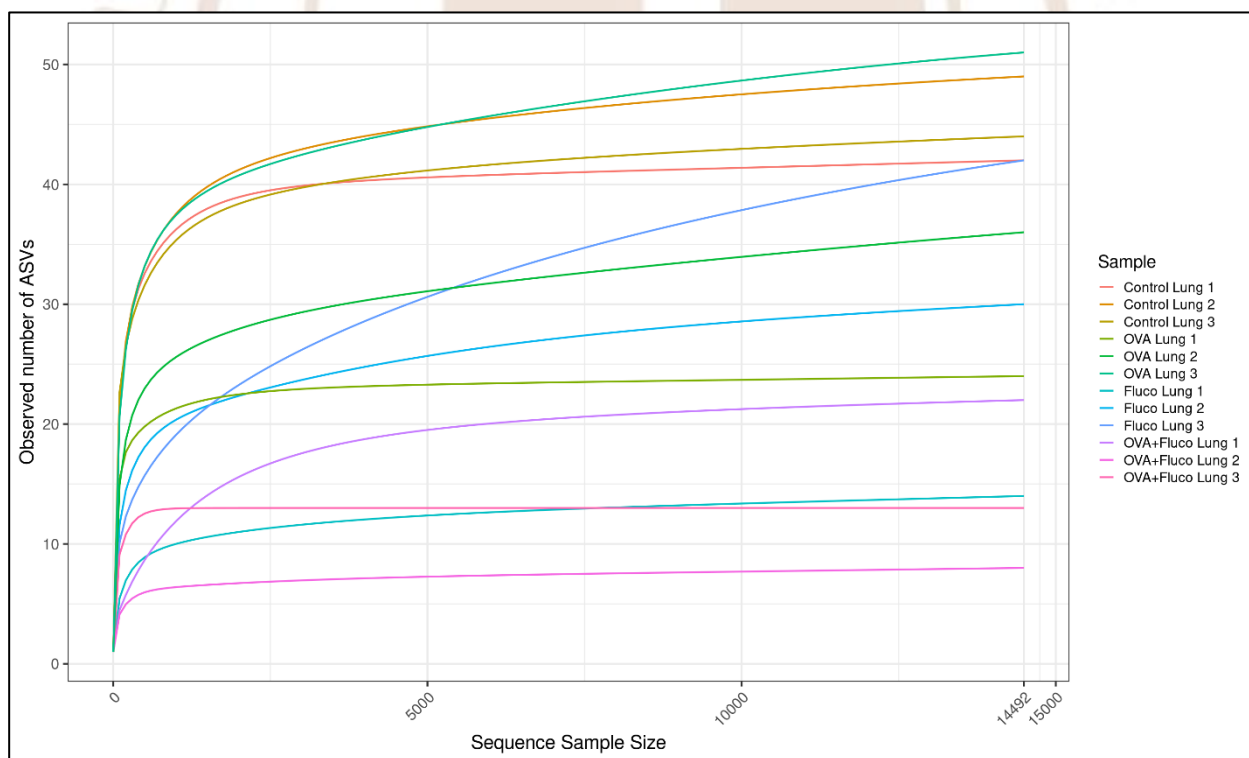

### Figure:

Rarefaction\_curves.png

### 3. Alpha diversity

Alpha diversity analyses refer to bacterial diversity within each community (1). Box plots of alpha diversity (observed species, Chao1, Shannon, and phylogenetic diversity (PD) whole tree) in each sample group are shown. The black dots represent individual samples in each group. Alpha diversity values of each sample and quartiles of the distribution (minimum, first quartile, median, third quartile, and maximum of boxes) can be found. The alpha-diversity values are also provided as the table from the link below figure.

#### Suggestion by Porcinotec:

High quality reads of 16S rRNA after processing were 955,065 reads. The observed abundance of ASVs was the highest in control, followed by OVA+Adjuvant, Fluconazole, and OVA+Adjuvant+Fluconazole, respectively. Moreover, the similar results were observed in Chao1 richness index and Shannon evenness. However, there were no statistically significant difference among the sample groups (Kruskal Wallis test;  $p > 0.05$ ). These findings illustrated that the highest bacterial abundance (Chao1) and diversity (Shannon) were found in control, while the lowest microbiota was observed in OVA+Adjuvant+Fluconazole.

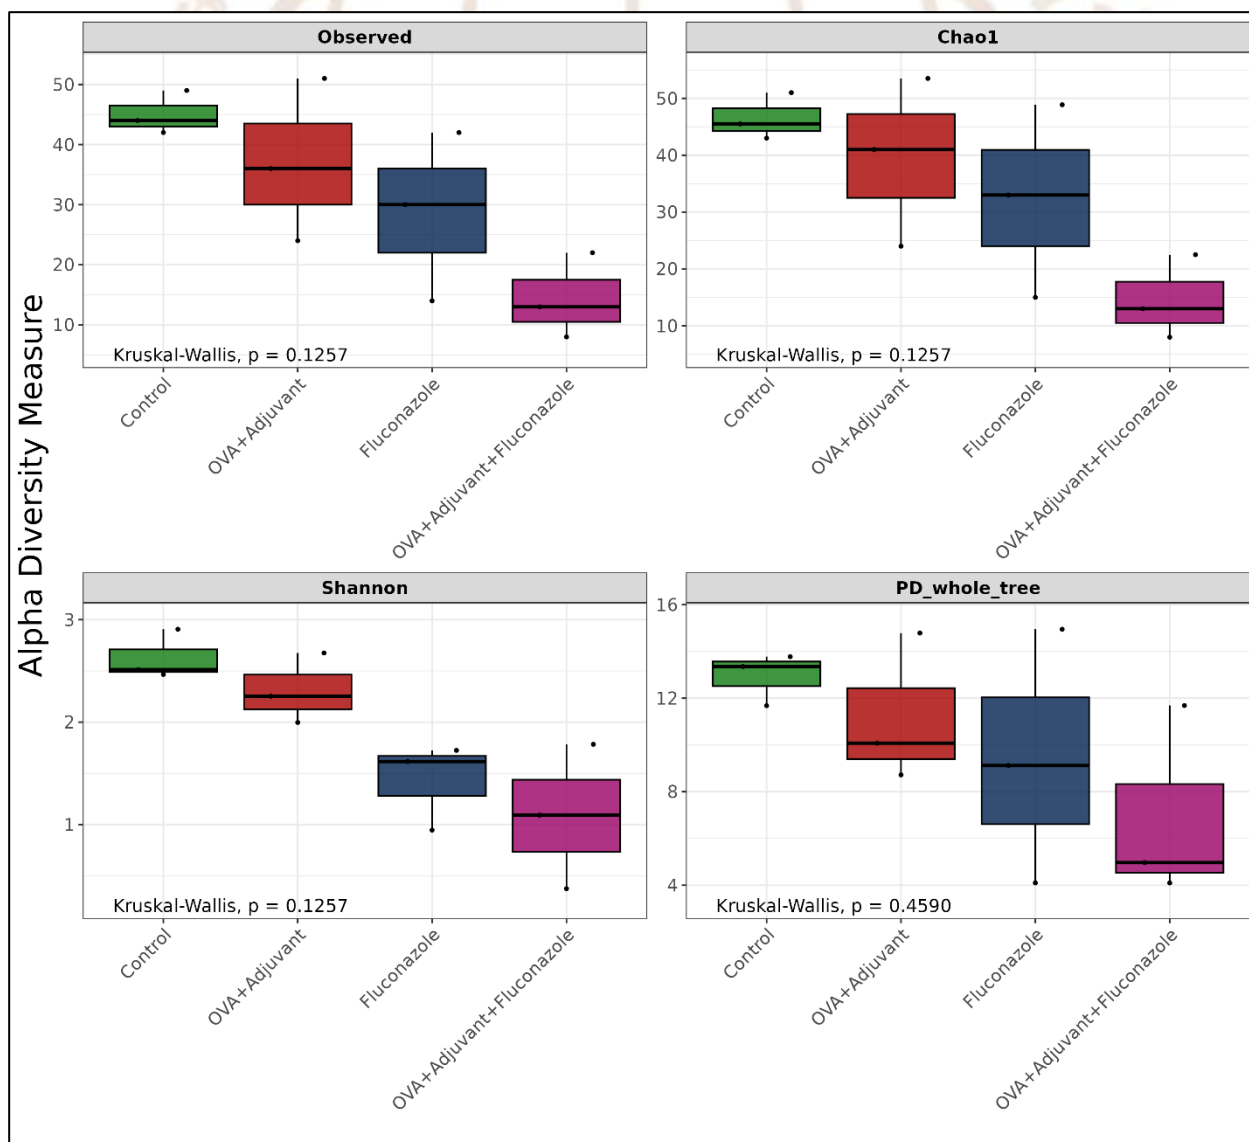



| No. | Sample ID           | Reads   | Observed ASVs | Chao1 | Shannon | PD whole tree |
|-----|---------------------|---------|---------------|-------|---------|---------------|
| 1   | Control Lung 1      | 89,127  | 42            | 43    | 2.47    | 11.68         |
| 2   | Control Lung 2      | 100,919 | 49            | 51    | 2.51    | 13.78         |
| 3   | Control Lung 3      | 86,703  | 44            | 45.5  | 2.91    | 13.35         |
| 4   | Fluco Lung 1        | 64,884  | 14            | 15    | 0.95    | 4.10          |
| 5   | Fluco Lung 2        | 67,696  | 30            | 33    | 1.72    | 9.12          |
| 6   | Fluco Lung 3        | 97,788  | 42            | 48.87 | 1.62    | 14.95         |
| 7   | OVA+Fluco<br>Lung 1 | 14,492  | 22            | 22.5  | 1.09    | 11.69         |
| 8   | OVA+Fluco<br>Lung 2 | 26,521  | 8             | 8     | 0.37    | 4.10          |
| 9   | OVA+Fluco<br>Lung 3 | 65,220  | 13            | 13    | 1.78    | 4.97          |
| 10  | OVA Lung 1          | 94,720  | 24            | 24    | 2.25    | 8.72          |

**Figure:**

plot\_richness\_boxplot\_Group.png

**HTML:**

plot\_richness\_boxplot\_Group.html

**Table:**

Summary\_richness.txt

#### 4. Beta diversity

Beta diversity analyses represent the difference in microbial community between samples, or a simpler definition would be, how similar or different it is between your samples. To estimate the beta diversity, principal coordinate analysis (PCoA) on weight/unweight UniFrac distances, generalized UniFrac (GUniFrac) distances, and non-metric multidimensional scaling (NMDS) based on Bray-Curtis dissimilarity are usually performed (2).

PCoA is a multidimensional scaling method to visualize the dissimilarity of data (3). It uses the actual distances between samples as input for the dissimilarity matrix. UniFrac distances measure the phylogenetic distance between a pair of samples (2). Weighted distance takes into account the relative abundance of taxa shared between samples combined with phylogenetic distance, but unweighted UniFrac distance considers a qualitative diversity metric (only presence/absence of taxa in a sample). However, these are limited to both rare phylogenies for unweighted UniFrac distance and most abundant lineages for weighted UniFrac distances. Therefore, GUniFrac distance has been developed to overcome the limitations on two UniFrac distances (4). Thus, GUniFrac distance can be used to detect a much wider range of changed microbiota composition.

NMDS is non-parametric approach (3). The actual distances between samples are converted into rank orders for creating the dissimilarity matrix. The Bray-Curtis dissimilarity is calculated based on non-phylogenetic measurement with microbial abundance between a pair of samples (similar to weighted UniFrac). Please note that NMDS is calculated based on non-metric distances, while PCoA is a matrix of dissimilarities between samples.

|                         | Parametric distances | Non-parametric distances | Phylogenetic | Relative abundance |
|-------------------------|----------------------|--------------------------|--------------|--------------------|
| PCoA Weighted UniFrac   | ✓                    | -                        | ✓            | ✓                  |
| PCoA Unweighted UniFrac | ✓                    | -                        | ✓            | -                  |
| NMDS Bray-Curtis        | -                    | ✓                        | -            | ✓                  |

For beta-diversity plots, the 2-dimensional PCoA on weighted/unweighted UniFrac distances, GUniFrac distances, and NMDS based on Bray-Curtis dissimilarity are generated as a pdf document. In addition, PERMANOVA testing is also provided across all sample groups and pairwise between samples. The customer can propose the parameters of interest to be analyzed.

#### **Suggestion by PorcinoTec:**

The GUniFrac with alpha 0.5 showed that microbiota communities were clearly separated among the sample groups (PERMANOVA test;  $p = 0.03796$ ). However, other beta-diversity plots were no significant difference among the groups. Moreover, the boxplot distance metric to control obtained from GUniFrac showed that Fluconazole and OVA+Adjuvant+Fluconazole were statically significant difference from the control ( $p=0.0029$ ).



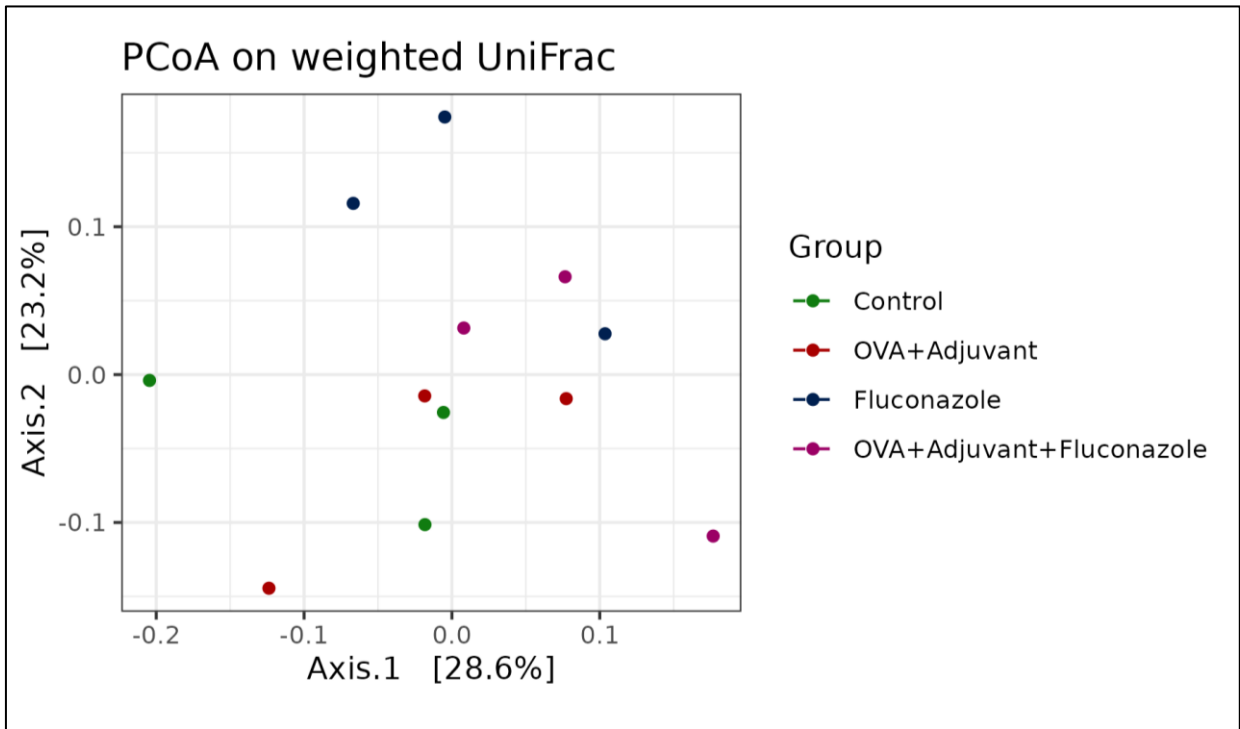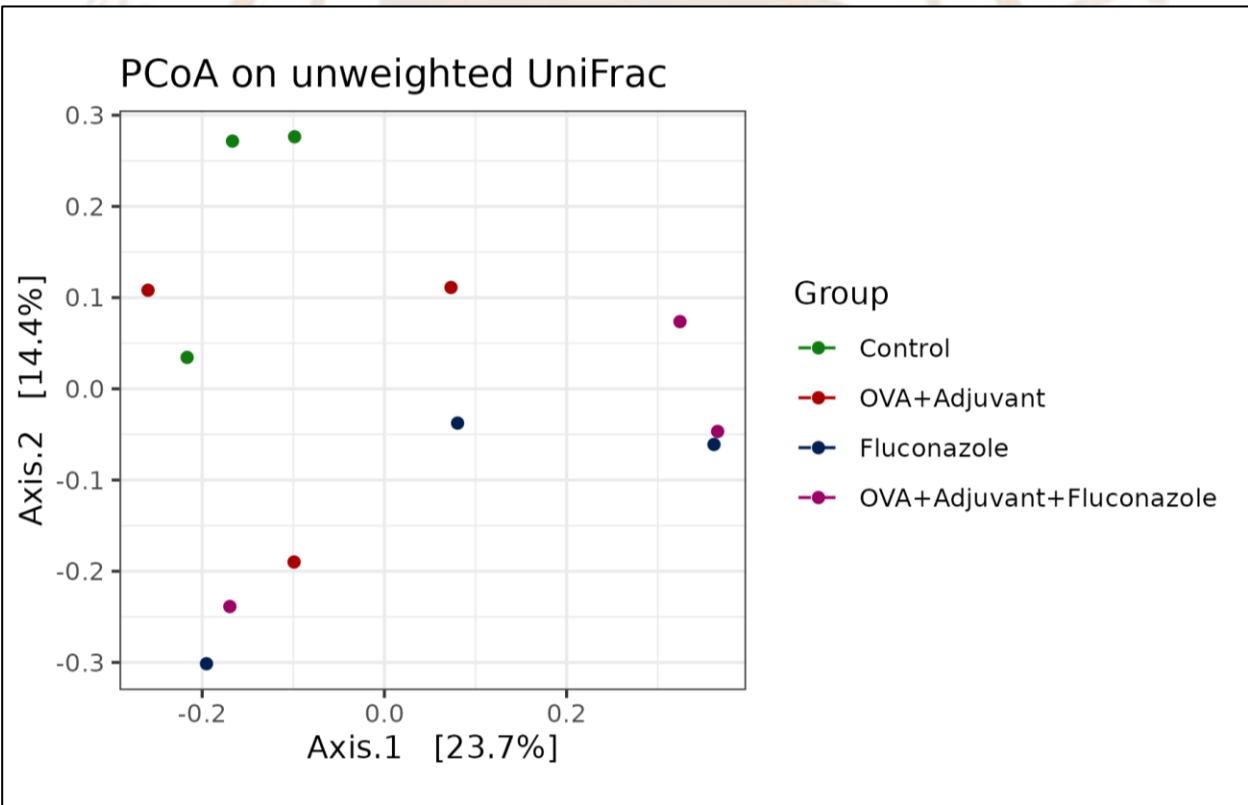

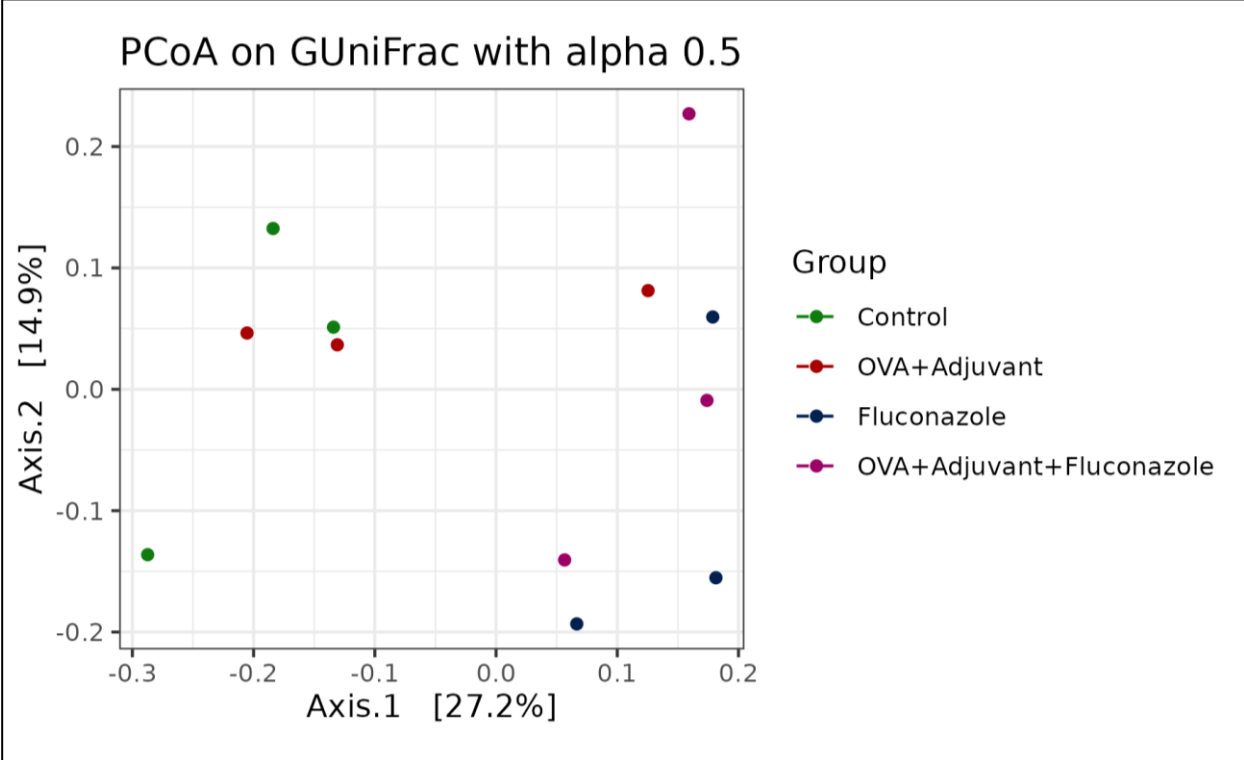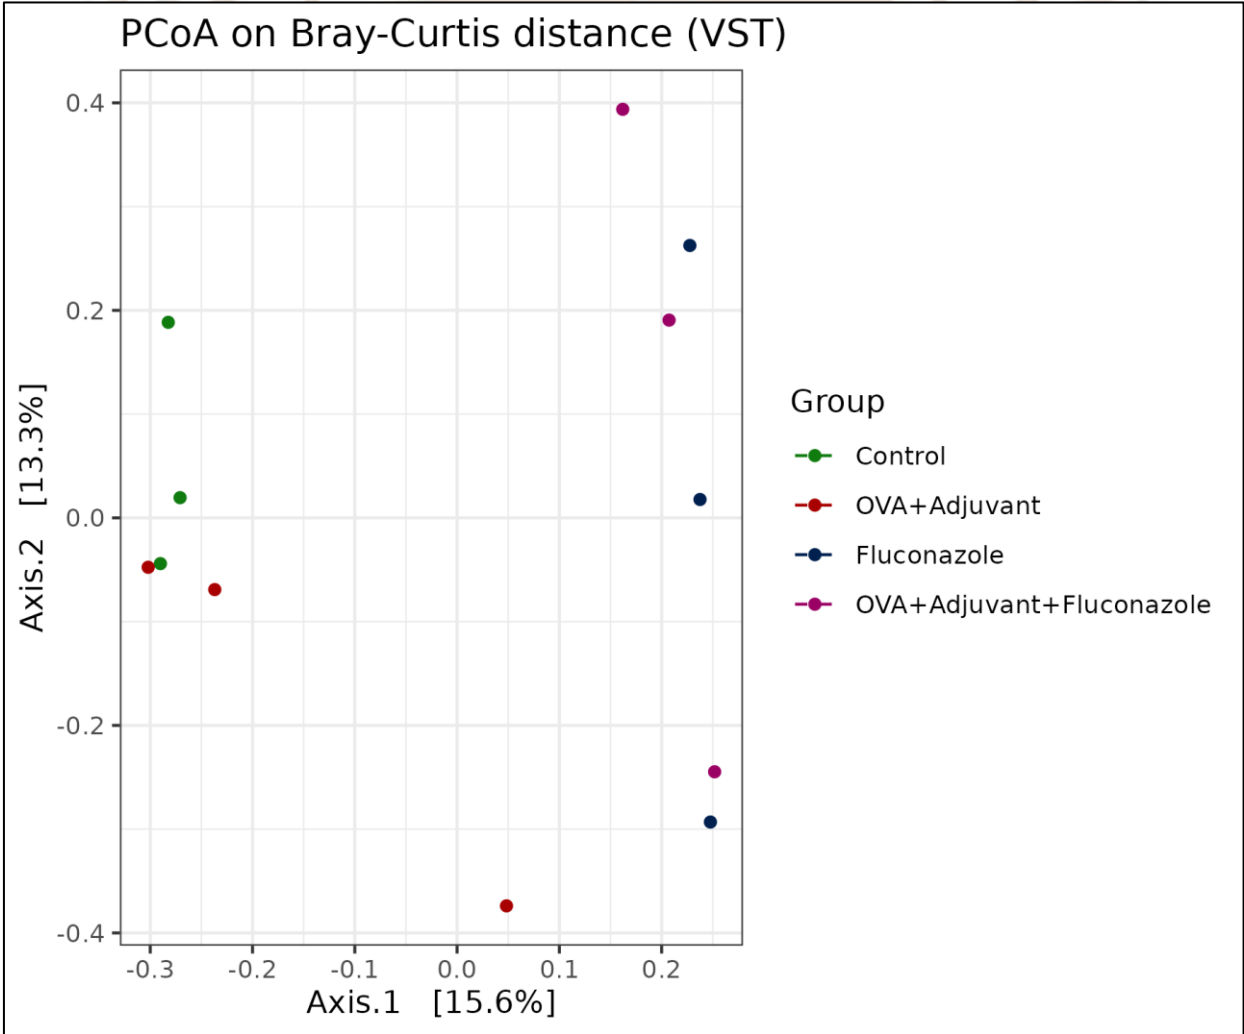

**PDF:**

plot\_ordination\_Group.pdf

**Figure:**

plot\_ordination\_Unweighted\_UniFrac\_Group.png

plot\_ordination\_Weighted\_UniFrac\_Group.png

plot\_ordination\_GUniFrac\_with\_alpha\_0.5\_Group.png

plot\_ordination\_Bray-Curtis\_Group.png

Boxplot\_GUniFrac with alpha 0.5\_distance.png

**HTML:**

plot\_Beta\_diversity\_PCoA\_on\_unweighted\_UniFrac.html

plot\_Beta\_diversity\_PCoA\_on\_weighted\_UniFrac.html

plot\_Beta\_diversity\_PCoA\_on\_GUniFrac\_with\_alpha\_0.05.html

plot\_Beta\_diversity\_PCoA\_on\_PCoA\_Bray\_Curtis\_distance.html

**PERMANOVA Table:**

statistic\_PERMANOVA\_Bray-Curtis\_beta\_diversity.txt

statistic\_PERMANOVA\_GUniFrac\_with\_alpha0.5\_beta\_diversity.txt

statistic\_PERMANOVA\_Unweighted\_UniFrac\_beta\_diversity.txt

statistic\_PERMANOVA\_Weighted\_UniFrac\_beta\_diversity.txt

statistic\_PERMANOVA\_Distance\_GUniFrac with alpha 0.5\_beta\_diversity.txt

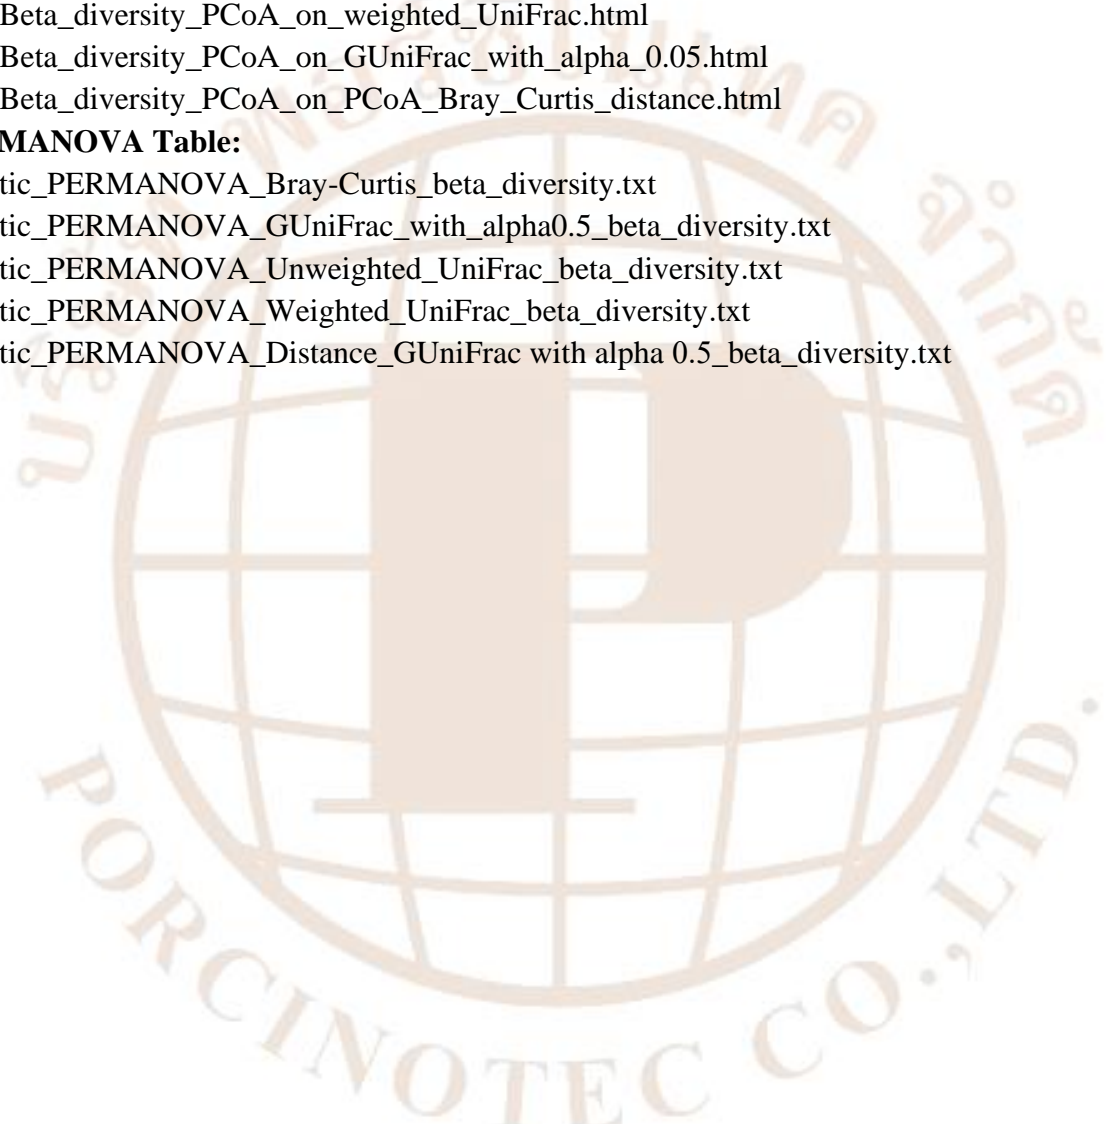

## 5. Taxonomic profiles

### Bar chart

Microbiota compositions of different taxa profiles (phylum, class, order, family, and genus) are frequently visualized by bar charts. Different color represents different taxa compositions. Microbial composition graph of each taxonomy level and abundance tables can be accessed from the link below the figure. You can visualize the abundance of each bacterium on the HTML files.

### Suggestion by Porcinotec:

A total of 13 different bacterial phyla were identified. The bacteria of phylum Proteobacteria were highly prevalent (avg.  $64.95 \pm 6.02\%$ ), followed by Firmicutes, Bacteroidota, and Actinobacteriota, respectively. The Proteobacteria was increased in OVA+Adjuvant (avg.  $73.84 \pm 7.15\%$ ) compared to control (avg.  $6.41 \pm 11.62\%$ ). The Firmicutes was increased in Fluconazole (avg.  $37.13 \pm 17.9\%$ ) when compared to the control (avg.  $24.95 \pm 8.82\%$ ), while Bacteroidota was lower in this group. The member of Firmicutes was decreased in OVA+Adjuvant+Fluconazole compared to other 3 groups.

Overall, 77 genera were detected among samples. There was high variation in lung microbiome among the samples. Interestingly, the member of *Burkholderia-Caballeronia-Paraburkholderia* was increased in Fluconazole (avg.  $50.29 \pm 21.35\%$ ) compared to control (avg.  $24.15 \pm 4.08\%$ ), while it was decreased in both OVA+Adjuvant+Fluconazole and OVA+Adjuvant groups. This data indicated that both OVA+Adjuvant and Fluconazole had an effect on *Burkholderia-Caballeronia-Paraburkholderia*. OVA+Adjuvant could decrease the composition of *Burkholderia-Caballeronia-Paraburkholderia*, while Fluconazole might increase the population of this bacterium. However, OVA+Adjuvant had a higher effect on lung microbiome than Fluconazole, which could be observed from the decrease of this bacterium in OVA+Adjuvant+Fluconazole group as well as OVA+Adjuvant.

### Phylum

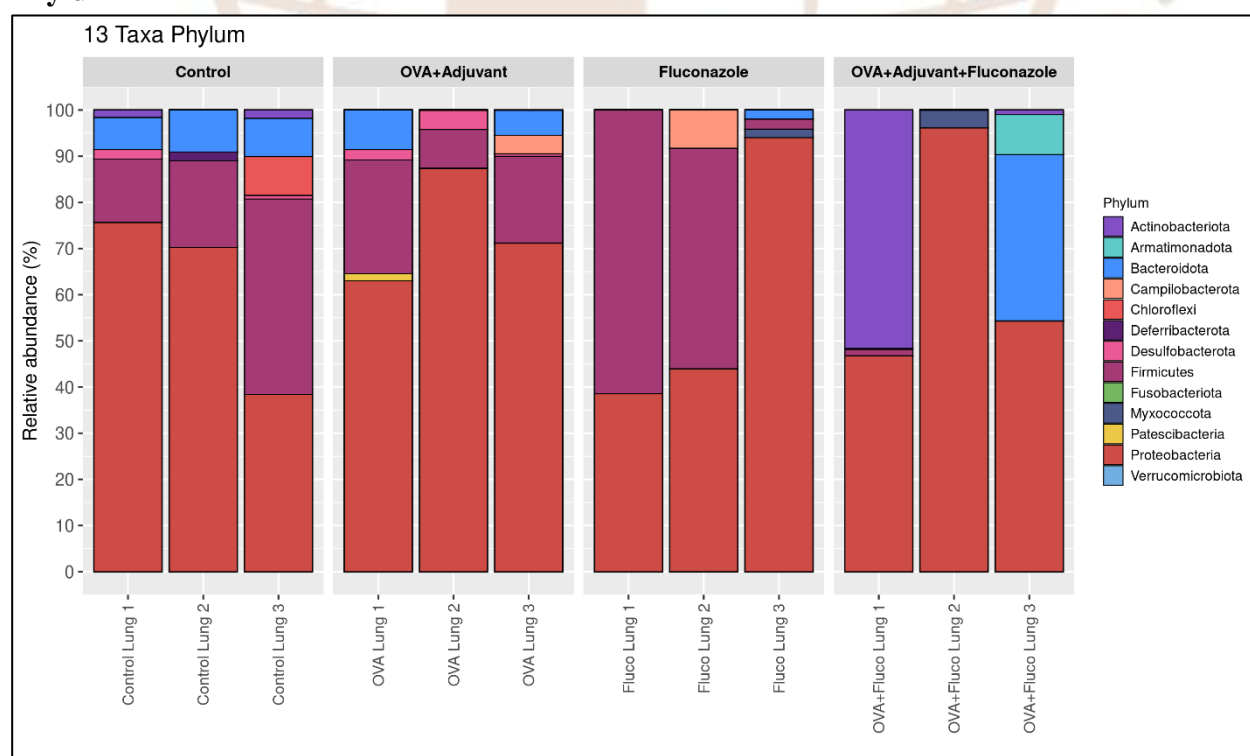

## Class

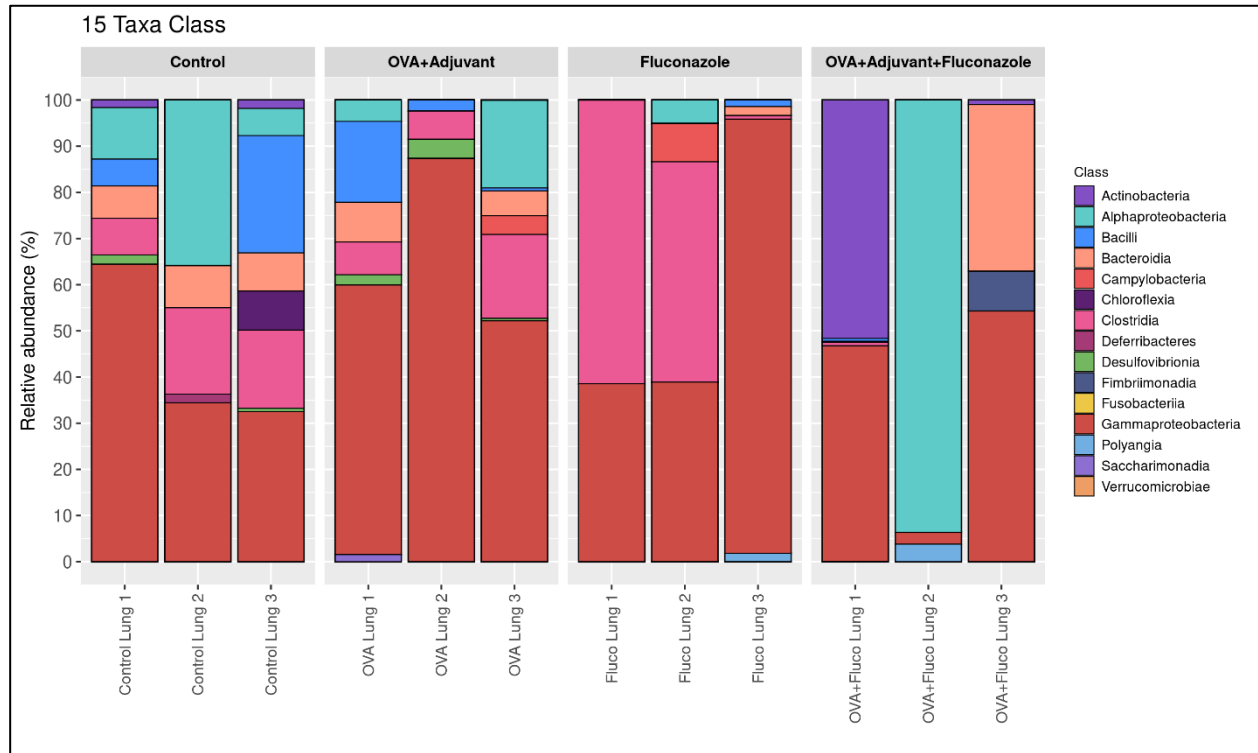

## Order

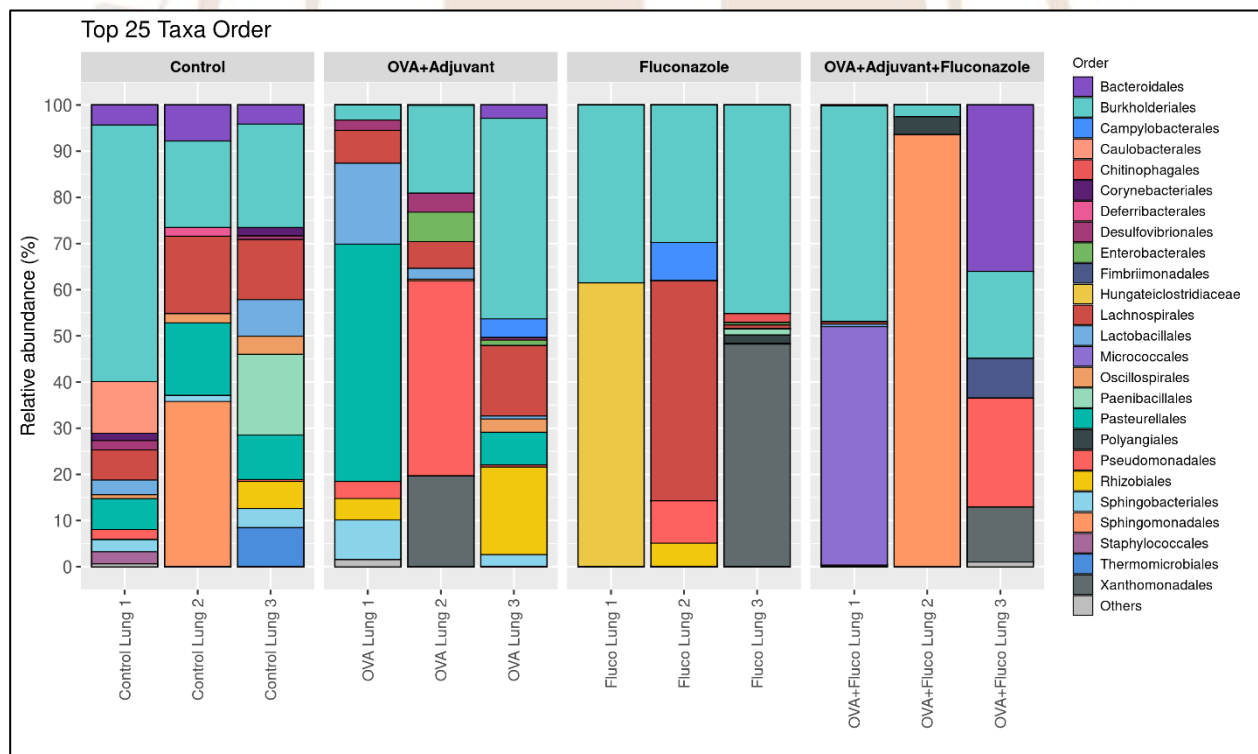



# Family

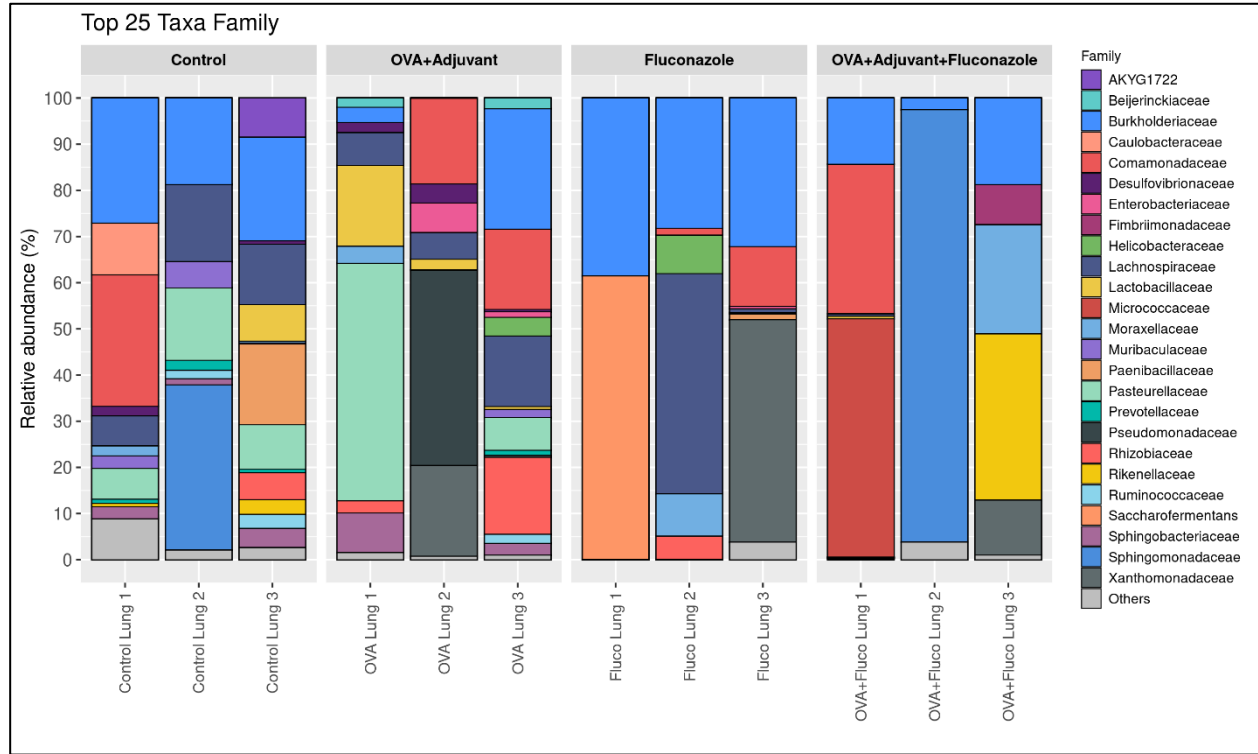

# Genus

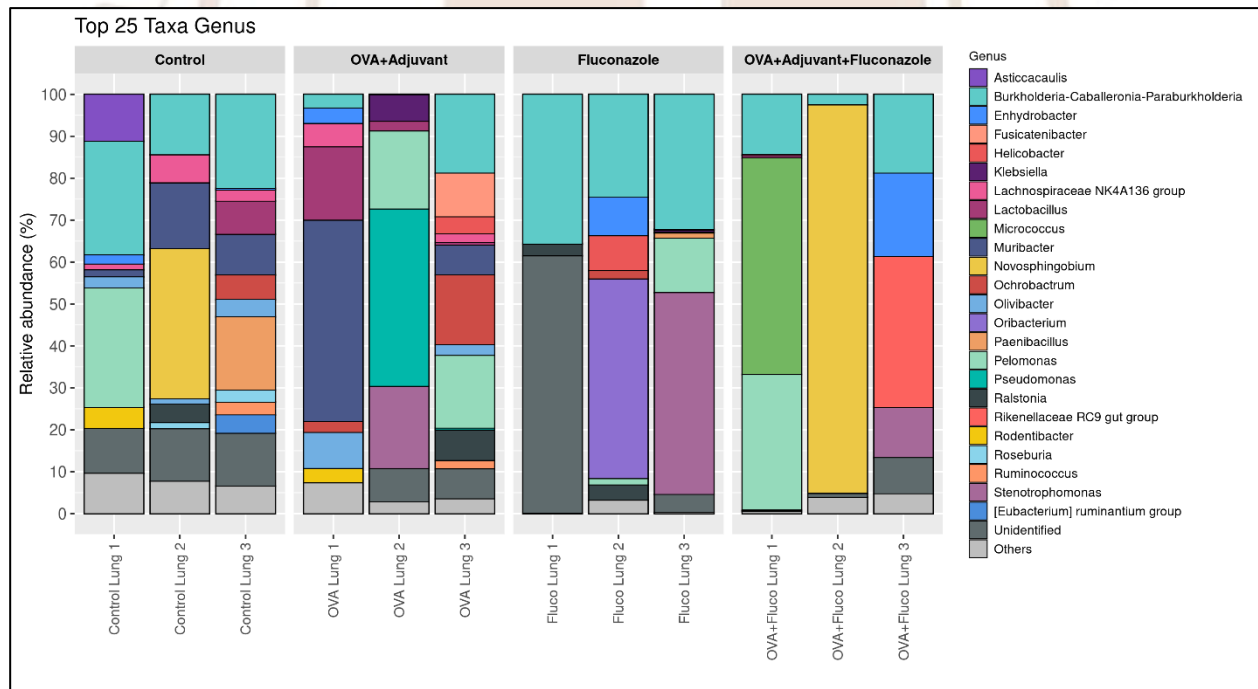

**Microbial all taxa (Figure):**

Phylum; plot\_bar\_phylum\_Group.png  
plot\_bar\_phylum\_avg.png  
Class; plot\_bar\_class\_Group.png  
plot\_bar\_class\_avg.png  
Order; plot\_bar\_order\_Group.png  
plot\_bar\_order\_avg.png  
Family; plot\_bar\_family\_Group.png  
plot\_bar\_family\_avg.png

**Microbial top 25 taxa (Figure):**

Order; plot\_bar\_order\_top25\_Group.png  
plot\_bar\_order\_top25\_avg.png  
Family; plot\_bar\_family\_top25\_Group.png  
plot\_bar\_family\_top25\_avg.png  
Genus; plot\_bar\_genus\_top25\_Group.png  
plot\_bar\_genus\_top25\_avg.png

**Microbial all taxa (HTML):**

Phylum; plot\_bar\_phylum\_Group.html  
Class; plot\_bar\_class\_Group.html  
Order; plot\_bar\_order\_Group.html  
Family; plot\_bar\_family\_Group.html

**Microbial top 25 taxa (HTML):**

Order; plot\_bar\_order\_top25\_Group.html  
Family; plot\_bar\_family\_top25\_Group.html  
Genus; plot\_bar\_genus\_top25\_Group.html

**Abundance tables:**

expr.abundance.all.txt  
expr.relative\_abundance.all.txt  
expr.asv.fasta  
expr.relative\_abundance.phylum.txt  
expr.relative\_abundance.class.txt  
expr.relative\_abundance.order.txt  
expr.relative\_abundance.family.txt  
expr.relative\_abundance.genus.txt



## 6. Linear discriminant analysis effect size (LEfSe) and Cladogram

LEfSe is used to determine the significantly higher taxonomy, genes, or functions, which can explain the difference in taxa between groups (6). It is usually used to identify biomarkers between 2 or more sample groups based on bacterial relative abundances. The bar plot represents the effect size (LDA) for a significant taxon in a certain group. The length of the bar represents a log<sub>10</sub> transformed LDA score. The colors represent which group that taxa are highly presented compared to the other group. We also provide the taxonomic table of LEfSe input as the following table.

Cladogram explains the differentially abundant taxonomic clades according to LEfSe analysis. The dot color and shading represent significantly higher abundance of taxon in a certain group. The significant phyla are presented as dots in the centre, while the significant genera are shown in the outer circle. The name of significant phyla is given in the outermost circle for colored shading. The results from both LEfSe and cladogram are similar. Please notice that the result of LEfSe shows significant difference of single taxa level, while cladogram shows the different taxonomic clades (from phylum to genus) among groups.

### Suggestion by Porcinotec:

Bacterial taxa with LDA scores greater than 2 was shown in this report. Bacteria in member of *Escherichia\_Shigella* (belong to phylum Proteobacteria) was the core gut microbiota in Fluconazole ( $p < 0.05$ ). The Desulfobacterota, Desulfovibrionia, Desulfovibrionales, *Desulfovibrionaceae* were highly prevalent in OVA+Adjuvant ( $p < 0.05$ ).

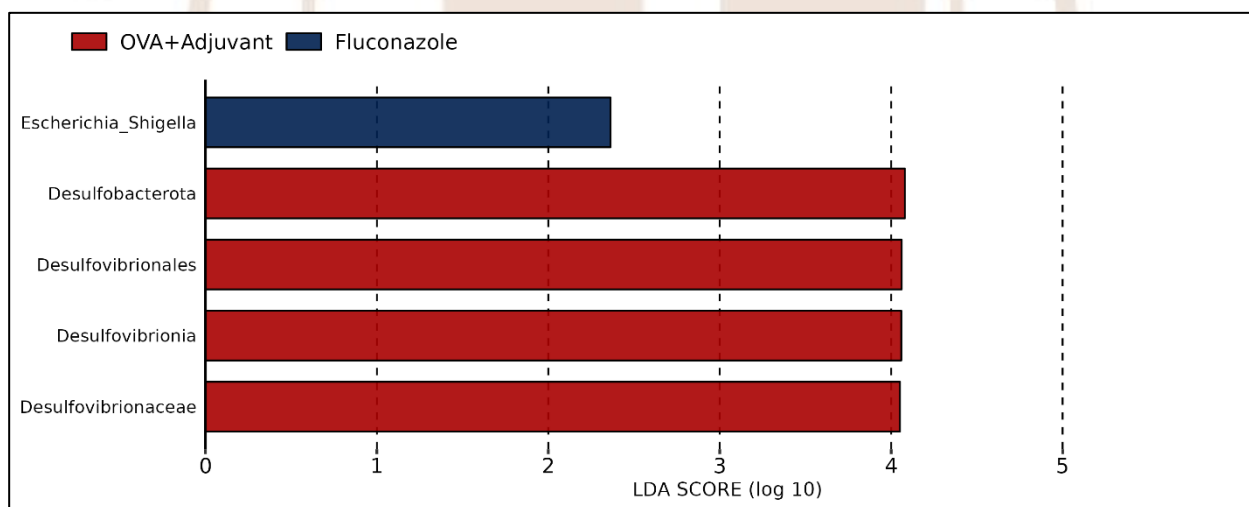

### Figure:

Plot\_LDA\_score.png

Plot\_Cladogram.png

### Table:

lefse\_table.txt

## 7. Heatmap of relative abundance

Heatmap is a graphical representation of data where different matrix values are represented as different shading of colors. It is necessary for visualizing the concentration of values between two dimensions of a matrix. In this case, heatmap is used for visualizing the bacterial abundance between samples. The heatmap figure can be downloaded with the same filename below the figure.

### Suggestion by Porcinotec:

*Burkholderia-Caballeronia-Paraburkholderia* was enrich in all samples. Eight ASVs were dominant in control, while there were rarely found in OVA+Adjuvant and Fluconazole groups. The relative abundance of *Desulfovibrionaceae*, *Muribaculaceae*, *Lachnospiraceae*, *Enhydrobacter*, *Lachnospiraceae NK4A136 group*, *Olivibacter*, *Muribacter*, and *Lactobacillus* were highly prevalent in control group. The bacterial profiles in OVA+Adjuvant were almost the same as control.

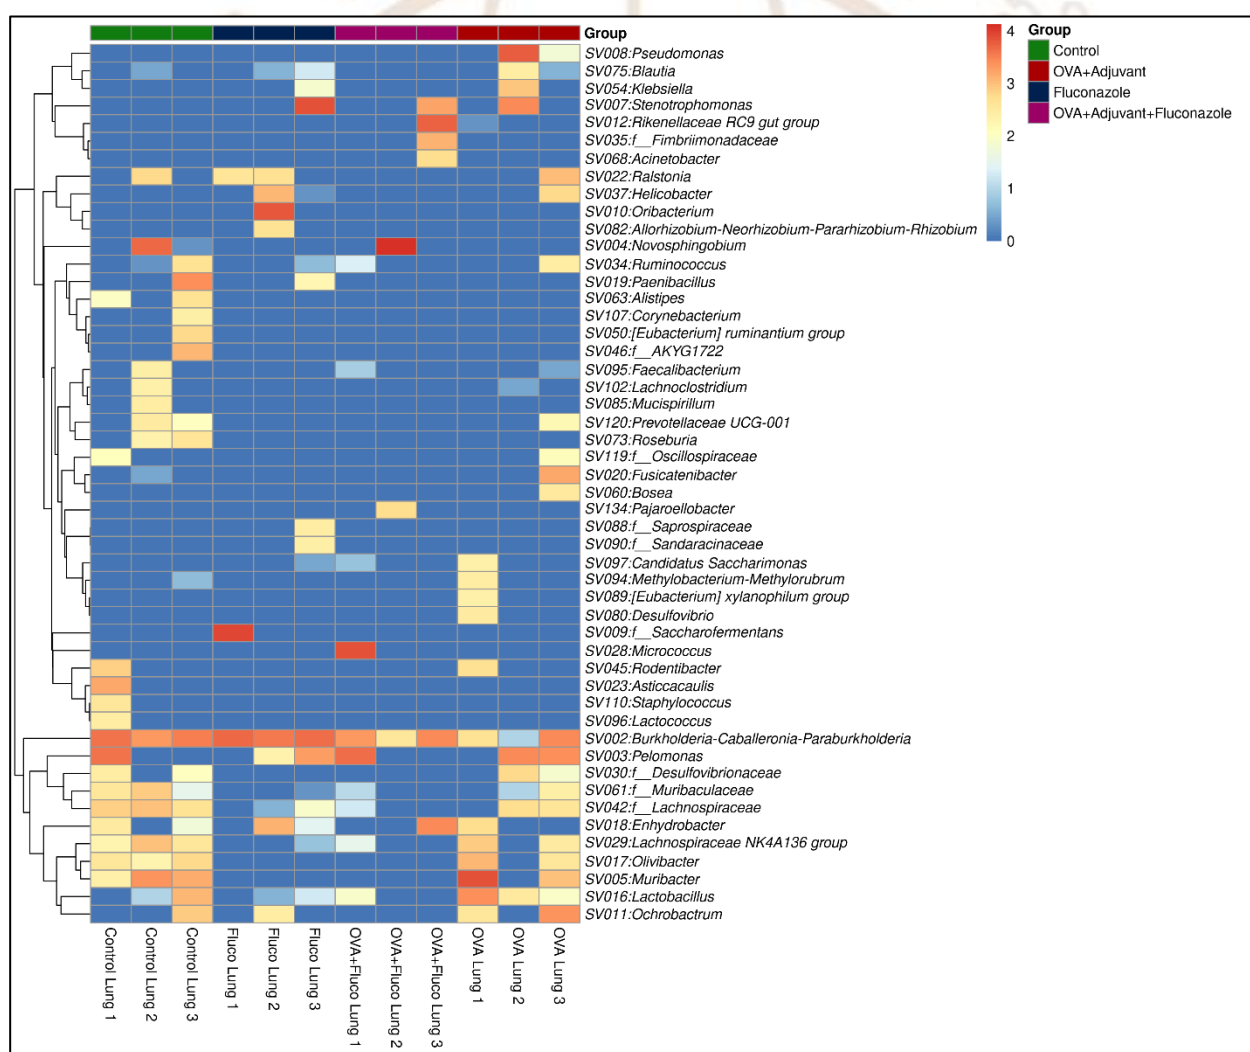

### Figure:

Heat\_map\_label\_ASV\_number\_top50ASVs\_Genus\_Group.png



## 8. Pipeline analysis

|                           | <b>Pipeline</b>                                                                                                                                                                                                                                                                                                                                                                                                                                                                             | <b>Detail</b>                                                                                                                                                                                                                                                                                                                                                                                                                                      |
|---------------------------|---------------------------------------------------------------------------------------------------------------------------------------------------------------------------------------------------------------------------------------------------------------------------------------------------------------------------------------------------------------------------------------------------------------------------------------------------------------------------------------------|----------------------------------------------------------------------------------------------------------------------------------------------------------------------------------------------------------------------------------------------------------------------------------------------------------------------------------------------------------------------------------------------------------------------------------------------------|
| Taxonomic reference data  | Silva version 138                                                                                                                                                                                                                                                                                                                                                                                                                                                                           | <a href="https://www.arb-silva.de/documentation/release-138/">https://www.arb-silva.de/documentation/release-138/</a>                                                                                                                                                                                                                                                                                                                              |
| Bioinformatics' pipelines | DADA2 v1.16.0                                                                                                                                                                                                                                                                                                                                                                                                                                                                               | <a href="https://benjjneb.github.io/dada2/">https://benjjneb.github.io/dada2/</a>                                                                                                                                                                                                                                                                                                                                                                  |
| R                         | R version 4.0.4 (2021-02-15)                                                                                                                                                                                                                                                                                                                                                                                                                                                                | <a href="https://www.r-project.org/">https://www.r-project.org/</a>                                                                                                                                                                                                                                                                                                                                                                                |
| R packages                | venneuler_1.1-0<br>rJava_0.9-13<br>dendextend_1.14.0<br>RColorBrewer_1.1-2<br>viridis_0.5.1<br>viridisLite_0.3.0<br>microbiomeutilities_1.00.15<br>microbiome_1.10.0<br>ggpubr_0.4.0<br>ranacapa_0.1.0<br>plotly_4.9.3<br>vegan_2.5-7<br>lattice_0.20-41<br>permute_0.9-5<br>ggrepel_0.9.1<br>ggbeeswarm_0.6.0<br>DESeq2_1.30.1<br>SummarizedExperiment_1.20.0<br>Biobase_2.50.0<br>MatrixGenerics_1.2.1<br>matrixStats_0.58.0<br>GenomicRanges_1.42.0<br>GenomeInfoDb_1.26.4<br>rexmap_1.1 | forcats_0.5.1<br>stringr_1.4.0<br>dplyr_1.0.5<br>purrr_0.3.4<br>readr_1.4.0<br>tidyr_1.1.3<br>tibble_3.1.0<br>tidyverse_1.3.0<br>DECIPHER_2.16.1<br>RSQLite_2.2.5<br>Biostrings_2.58.0<br>XVector_0.30.0<br>IRanges_2.24.1<br>S4Vectors_0.28.1<br>BiocGenerics_0.36.0<br>ggplot2_3.3.3<br>phangorn_2.6.2<br>ape_5.4-1<br>phyloseq_1.34.0<br>data.table_1.14.0<br>dada2_1.16.0<br>Rcpp_1.0.6<br>microbiomeMarker_0.0.1.9000<br>pairwiseAdonis_0.0.1 |

## 9. Material and methods

### 16S rRNA library sequencing

The prokaryotic 16S rRNA gene at V3V4 region was performed using the Qiagen QIAseq 16S/ITS Region panel (Qiagen, Hilden, Germany). The targeted PCR was followed cycling conditions: 95 °C for 2 min, and 20 cycles of 95°C for 30 s, 50 °C for 30 s and 72 °C for 2 min, followed by 72 °C for 7 min. The 16S rRNA amplicons were purified by QIAseq magnetic beads and labeled with different sequencing adaptors using QIAseq 16S/ITS Region Panel Sample Index PCR Reaction (Qiagen, Hilden, Germany). The index PCR reaction was followed cycling conditions: 95 °C for 2 min, and 22 cycles of 95°C for 30 s, 60 °C for 30 s and 72 °C for 2 min, followed by 72 °C for 7 min. The DNA libraries with different index (approximately 630 bp) were purified using QIAseq magnetic beads (Qiagen, Hilden, Germany). The quality and quantity of DNA libraries were evaluated using DeNovix QFX Fluorometer and QIAxcel Advanced (Qiagen, Hilden, Germany), respectively. Paired-end sequencing, 2 × 300, was performed using Illumina Miseq platform following the manufacturer's protocols (Illumina, San Diego, CA, USA).

### Bioinformatics analyses

The raw sequences were categorized into groups based on the 5' barcode sequences. The sequences were processed following DADA2 v1.16.0 pipeline (<https://benjjneb.github.io/dada2/>). The DADA2 pipeline describes microbial diversity and community structures using unique amplicon sequence variants (ASVs) (7). Microbial taxa were classified from Silva version 138 as a reference database (8). Alpha diversity index (Chao1 richness, Shannon, and PD whole tree) was computed using DADA2 software. For Beta diversity, non-metric multidimensional scaling (NMDS) based on Bray-Curtis dissimilarity and principal coordinate analysis (PCoA) were plotted from Phyloseq data. Linear discriminant analysis effect size (LEfSe) and cladogram plot were performed to identify the bacterial biomarkers.

### Data analysis

Pairwise comparison of alpha diversity (Observed ASVs, Chao1, Shannon, and PD whole tree) was calculated using Kruskal-Wallis test ( $p < 0.05$ ). Permutational multivariate analysis of variance (PERMANOVA) was performed to evaluate the significant differences for beta diversity among groups at  $p < 0.05$ . Moreover, the Kruskal-Wallis sum-rank test was also used in LEfSe analysis to identify bacterial biomarkers that differed significantly in abundant taxon between sample groups.

### Availability of Supporting Data

Nucleic acid sequences in this study were deposited in an open access Sequence Read Archive (SRA) database of NCBI, accession number SAMN37501218.

## 10. References

1. Willis AD. Rarefaction, Alpha Diversity, and Statistics. *Front Microbiol.* 2019;10:2407.
2. Jovel J, Patterson J, Wang W, Hotte N, O'Keefe S, Mitchel T, et al. Characterization of the Gut Microbiome Using 16S or Shotgun Metagenomics. *Frontiers in Microbiology.* 2016;7.
3. Ramette A. Multivariate analyses in microbial ecology. *Fems Microbiol Ecol.* 2007;62(2):142-60.
4. Xia Y, Sun J. Hypothesis Testing and Statistical Analysis of Microbiome. *Genes Dis.* 2017;4(3):138-48.
5. Ondov BD, Bergman NH, Phillippy AM. Krona: Interactive Metagenomic Visualization in a Web Browser. In: Nelson KE, editor. *Encyclopedia of Metagenomics.* New York, NY: Springer New York; 2013. p. 1-8.
6. Segata N, Izard J, Waldron L, Gevers D, Miropolsky L, Garrett WS, et al. Metagenomic biomarker discovery and explanation. *Genome Biol.* 2011;12(6):R60.
7. Callahan BJ, McMurdie PJ, Rosen MJ, Han AW, Johnson AJ, Holmes SP. DADA2: High-resolution sample inference from Illumina amplicon data. *Nat Methods.* 2016;13(7):581-3.
8. Quast C, Pruesse E, Yilmaz P, Gerken J, Schweer T, Yarza P, et al. The SILVA ribosomal RNA gene database project: improved data processing and web-based tools. *Nucleic Acids Res.* 2013;41(Database issue): D590-6.
